# Supplementary material for: Review Article: Wind and storm damage: From Meteorology to Impacts
Source: Copernicus journal article supplement (doi:10.5194/nhess-2022-159), 2022-06-22
Supplement: Supplementary file 1 [file nhess-2022-159-supplement.pdf]

# Supplementary materials: Wind and storm damage: From Meteorology to Impacts

Daniel Glikson<sup>1,2</sup>, Paul Averbeck<sup>3</sup>, Nico Becker<sup>4,5</sup>, Barry Gardiner<sup>6,7</sup>, Valeri Goldberg<sup>1</sup>, Jens Grieger<sup>4</sup>, Dörthe Handorf<sup>8</sup>, Karsten Haustein<sup>9,#</sup>, Alexia Karwat<sup>10</sup>, Florian Knutzen<sup>9</sup>, Hilke S. Lentink<sup>11</sup>, Rike Lorenz<sup>4</sup>, Deborah Niermann<sup>12</sup>, Joaquim G. Pinto<sup>11</sup>, Ronald Queck<sup>1</sup>, Astrid Ziemann<sup>1</sup>, and Christian L. E. Franzke<sup>13,14</sup>

1 Technische Universität Dresden, Faculty of Environmental Sciences, Institute for Hydrology and Meteorology, Chair of Meteorology, Piennner Str. 23, 01737 Tharandt Germany

2 Chair of Computational Landscape Ecology, Institute of Geography, Technische Universität Dresden, Helmholtzstr. 10, 01069, Dresden, Germany

3 iES Landau, Institute for Environmental Sciences, University of Koblenz-Landau, Fortstraße 7, 76829 Landau, Germany

4 Freie Universität Berlin, Institut für Meteorologie, Berlin, Germany

5 Hans-Ertel-Centre for Weather Research, Berlin, Germany

6 Faculty of Environment and Natural Resources, Albert-Ludwigs University, Freiburg, Germany.

7 Institut Européen de la Forêt Cultivée, Cestas, France.

8 Alfred Wegener Institute, Helmholtz Centre for Polar and Marine Research, Research Department Potsdam, Telegrafenberg A45-ND-14473 Potsdam, Germany

9 Climate Service Center Germany (GERICS), Helmholtz-Zentrum hereon, Fischertwiete 1, 20095 Hamburg, Germany

10 Universität Hamburg, Meteorological Institute, Grindelberg 5, 20144 Hamburg, Germany

11 Institute of Meteorology and Climate Research, Department of Tropospheric Research (IMK-TRO), Karlsruhe Institute of Technology (KIT), Karlsruhe, Germany

12 Deutscher Wetterdienst, Frankfurter Straße 135, 63067 Offenbach, Germany

13 Center for Climate Physics, Institute for Basic Science, Busan, Republic of Korea

32 14 Pusan National University, Busan, Republic of Korea

33

34 # Now at Institute for Meteorology, University of Leipzig, Leipzig, Germany

35

36 Corresponding author: [christian.franzke@pusan.ac.kr](mailto:christian.franzke@pusan.ac.kr)

37

38

39

40

41

42

43

44

45

46

47

48

49

50

51

52

53

54

55

56

57

58

59

60

|                                                                                                              |                          |
|--------------------------------------------------------------------------------------------------------------|--------------------------|
| $SSI_{Lamb} = v^3 AD$                                                                                        | Lamb (1991)              |
| $SSI_{Leckebusch} = \sum_t^T \sum_k^K \left[ \max\left(0, \frac{v_{k,t}}{v_{perc,k}}\right)^3 * A_k \right]$ | Leckebusch et al. (2008) |
| $LI_{Pinto} = \sum_k \left(\frac{v_k}{v_{98k}}\right)^3 * I_k * P_k * L_k$                                   | Pinto et al. (2012)      |
| $SSI_{Haylock} = \sum_k \cos lat_k [0, v_k - th]^3$                                                          | Haylock (2011)           |

61 **Table S1. Storm severity and loss indices.**  $A$  denotes the area affected by damaging winds,  $D$  the  
62 duration of occurrence of damaging winds,  $I_k$  is an indicator of whether the wind speed exceeds  
63 the 98th percentile or not,  $k$  a location or a grid box index,  $L_k$  is an indicator of whether the grid box is  
64 over land or sea,  $lat_k$  is the latitude at a grid point,  $LI$  is a loss index,  $P_k$  is the population per grid point,  
65  $SSI$  is the storm severity index,  $th$  is a wind speed threshold,  $t$  is a time index,  $v$  denotes the maximum  
66 daily wind speed, and  $v_{perc}$  a local percentile of daily maximum wind speed.

67  
68  
69  
70  
71  
72  
73  
74  
75  
76  
77  
78  
79  
80  
81  
82  
83

84 Table S2: List of area specific wind speed thresholds and their potential impacts and  
 85 consequences.

| Affected Area/Scale of impact | Threshold<br>[m / s] | Consequences                                                                                                                                  | Reference                                                                                                                                                                                                                                                                         |
|-------------------------------|----------------------|-----------------------------------------------------------------------------------------------------------------------------------------------|-----------------------------------------------------------------------------------------------------------------------------------------------------------------------------------------------------------------------------------------------------------------------------------|
| Forest (refers to 10 m)       |                      |                                                                                                                                               |                                                                                                                                                                                                                                                                                   |
| Local (specific locations)    | 22-25<br>(gust)      | Limited area of damage. Might not be visible from outside the forest.                                                                         | Derived from<br>(Gardiner et al., 2010)<br><br>(Gardiner et al., 2013)<br><br>(Gardiner et al., 2016)<br><br>Gardiner (2021)<br><br>(Mitchell, 2013)<br><br>(Quine and Malcolm, 2007)<br><br>(Quine, Gardiner, Moore, 2021)<br>(Usbeck et al., 2010)<br><br>(Valta et al., 2019)* |
| Stands/Forest                 | 25-32<br>(gust)      | Individual stands up to the forest level are affected. Damage level is meaningful for the affected forest and for short-term forest planning. | *                                                                                                                                                                                                                                                                                 |
| County to Department          | 32-40<br>(gust)      | Affects are important at the scale of whole forests and departmental jurisdictions and have impacts on long term planning.                    | *                                                                                                                                                                                                                                                                                 |

|                        |                   |                                                                                                                                                                                                                                                       |                           |
|------------------------|-------------------|-------------------------------------------------------------------------------------------------------------------------------------------------------------------------------------------------------------------------------------------------------|---------------------------|
| Regional to National   | 40-45 (gust)      | The damage is so severe, that it disrupts forest management and planning and severely affects timber prices at a regional or national level.                                                                                                          | *                         |
| National/Supernational | >45 (gust)        | The storm intensity is so high that damage can occur across several countries and the forest industry and wood supply are affected for a large part of Europe.                                                                                        | *                         |
| Urban (refers to 10 m) |                   |                                                                                                                                                                                                                                                       |                           |
| Local                  | 21.5 ± 3.5 (gust) | ** Loose light objects lifted from the ground. Scaffolding may be overturned. Slight damage to marquees and tents may occur. Tiles in exposed areas may come loose. No damage to loadbearingstructures.                                               | (Feuerstein et al., 2011) |
| local                  | 29.0 ± 4.0 (gust) | ** Light objects and garden furniture can be knocked over or fly through the air.. Wooden fences may be toppled. Minor damage to roofs (tiles and sheets may come loose and be blown down). Minor damage to light outbuildings. No structural damage. | (Feuerstein et al., 2011) |
|                        | 37.0 ± 4.0 (gust) | ** Heavier objects are lifted from the ground and can become dangerous projectiles.                                                                                                                                                                   | (Feuerstein et al., 2011) |

|                             |                       |                                                                                                                                                                                                                  |                                                   |
|-----------------------------|-----------------------|------------------------------------------------------------------------------------------------------------------------------------------------------------------------------------------------------------------|---------------------------------------------------|
|                             |                       | Caravans and trailers can be overthrown. Noticeable damage to tiled roofs and unstable flat roofs. Minor to moderate damage to light outbuildings. Initial damage to components of solid buildings possible.     |                                                   |
|                             | 41.0 ± 4.5 (gust)     | ** Numerous caravans and trailers are overthrown. Tiled roofs and unstable flat roofs are heavily damaged. Moderate damage to light outbuildings. Isolated damage to structural elements of permanent buildings. | (Feuerstein et al., 2011)                         |
| Transport (refers to 10 m)  |                       |                                                                                                                                                                                                                  |                                                   |
| Air - local                 | 13 (mean wind speed)  | For crosswinds need to change runways                                                                                                                                                                            | (Pejovic et al., 2009)                            |
| Railways and road - local   | >17 (gust)            | Disruptions, e.g. roads blocked due to windthrow                                                                                                                                                                 | (Vajda et al., 2014)                              |
| Shipping - Local            | >18 (mean wind speed) | Risk of sliding containers and flooding of open cargo holds. Maximum wind speed for crane operations                                                                                                             | (Club et al., 2011)<br>(Leviäkangas et al., 2011) |
| Road                        | >20 (mean wind speed) | Increasing number of wind-related accidents due to rollover and sideslips                                                                                                                                        | (Snaebjornsson et al., 2007)                      |
| Air/Road/Rail - Larger Area | >25 (gust)            | Delays or cancellations towards                                                                                                                                                                                  | (Vajda et al., 2014)                              |

|                                    |                                                                       |                                                                                                                                                                                                             |                                                                                   |
|------------------------------------|-----------------------------------------------------------------------|-------------------------------------------------------------------------------------------------------------------------------------------------------------------------------------------------------------|-----------------------------------------------------------------------------------|
|                                    |                                                                       | windthrow or electricity cuts                                                                                                                                                                               |                                                                                   |
| Rail - Large Area                  | >30 (gust)                                                            | Shaking and damage of overhead cables                                                                                                                                                                       | (Thornes and Davis., 2002)                                                        |
| Air/Rail/Road/<br>Water            | >32 (gust)                                                            | Longer power failures lead to delays and cancellation. Damages to traffic control devices and structures can occur. Airports close and ferries stay at the harbors due to reduced visibility and high waves | (Vajda et al., 2014)                                                              |
| Agriculture (refers to 10 m)       |                                                                       |                                                                                                                                                                                                             |                                                                                   |
| Local                              | 18.5-26.5 m/s (gust, varies across different crops, vegetables, etc.) | Damage to leaves due to windblown dust and rubbing leaves. Yield loss due to lodged fields                                                                                                                  | (Rouse and Hodges, 2004)<br><br>(Joseph et al., 2020)<br><br>(Baker et al., 2014) |
| Local                              | 9.0-14.5 m/s (gust)                                                   | Soil loss to wind erosion, i.e. erosion threshold                                                                                                                                                           | Shahabinejad et al. (2019)                                                        |
| Wind Energy (refers to hub-height) |                                                                       |                                                                                                                                                                                                             |                                                                                   |
|                                    | 2.5-4.5 (mean wind speed)                                             | Start of energy production for wind turbines (cut-in)                                                                                                                                                       | (Quaschnig, 2016)                                                                 |
|                                    | 20-34 (mean wind speed)                                               | Automatic shutdown of wind turbines (cut-out)                                                                                                                                                               | (Christakos et al., 2016)<br><br>(Quaschnig, 2016)                                |
|                                    | 50-70 (mean                                                           | Damage of wind turbines                                                                                                                                                                                     | (Quaschnig, 2016)                                                                 |

|  |             |  |  |
|--|-------------|--|--|
|  | wind speed) |  |  |
|--|-------------|--|--|

86 \* All references used in the forest section are the same for each wind speed range.

87 \*\* Reproduced from Feuerstein et al. (2011)

88

89

90

91

92

93

94

95

96

97

98

99

100

101

102

103

104

105

106

107

108

109

110

111

112

113



114 Table S3. The articles used in the assessment of topographic indices usefulness. “1”  
 115 and “0” denotes usefulness or not useful, respectively. TPI stands for topographic  
 116 positioning index.

|                                 | Elevation | Slope | Aspect | TOPEX | Curvature | Roughness | Distance to ridge | Distance to river | Inflection | Latitude | TPI | TRI - ruggedness |
|---------------------------------|-----------|-------|--------|-------|-----------|-----------|-------------------|-------------------|------------|----------|-----|------------------|
| <b>Albrecht et al., 2012</b>    | 0         |       |        | 1     |           |           |                   |                   |            |          |     |                  |
| <b>Albrecht et al., 2013</b>    | 1         |       |        | 1     |           |           |                   |                   |            |          |     |                  |
| <b>Albrecht et al., 2019</b>    | 0         |       |        | 1     |           |           |                   |                   |            |          |     |                  |
| <b>Batke et al., 2014</b>       | 0         | 0     | 1      |       |           |           |                   |                   |            |          |     |                  |
| <b>Decker, 2018</b>             |           |       |        |       |           |           |                   |                   |            |          |     |                  |
| <b>Díaz-Yáñez et al., 2019</b>  | 1         | 1     |        |       |           |           |                   |                   |            | 1        |     |                  |
| <b>Hanewinkel et al., 2004</b>  | 0         | 0     | 1      | 0     |           |           |                   |                   |            |          |     |                  |
| <b>Hanewinkel et al., 2014</b>  | 0         | 1     | 1      |       | 1         |           |                   |                   |            |          |     |                  |
| <b>Jung et al., 2016</b>        | 0         | 1     | 0      | 1     |           | 0         |                   |                   |            |          |     |                  |
| <b>Kramer et al., 2001</b>      | 1         | 1     |        |       |           |           |                   |                   | 1          |          |     |                  |
| <b>Krejci et al., 2018</b>      | 1         | 0     | 0      |       | 0         |           |                   |                   |            |          |     |                  |
| <b>Mayer et al., 2005</b>       | 1         | 1     |        |       |           |           |                   |                   |            |          |     |                  |
| <b>Mitchell et al., 2001</b>    | 0         | 0     | 0      | 1     |           |           |                   |                   |            |          |     |                  |
| <b>Morimoto et al., 2019</b>    |           | 1     |        | 1     |           |           |                   |                   |            |          |     |                  |
| <b>Murshed and Reed, 2016</b>   | 0         | 0     | 0      | 1     |           |           |                   |                   |            |          |     |                  |
| <b>Pasztor et al., 2015</b>     | 1         | 0     | 0      |       |           |           |                   |                   |            |          |     |                  |
| <b>Schindler et al., 2012</b>   | 0         | 0     | 0      | 1     | 0         |           | 0                 | 0                 |            |          |     |                  |
| <b>Schindler et al., 2016</b>   | 0         |       | 0      | 1     | 0         | 1         |                   |                   |            |          |     |                  |
| <b>Schütz et al., 2006</b>      | 0         | 1     | 1      |       |           |           |                   |                   |            |          |     |                  |
| <b>Scott and Mitchell, 2005</b> | 0         | 0     | 0      | 0     |           |           |                   |                   |            |          |     |                  |
| <b>Suvanto et al., 2016</b>     |           | 1     | 1      |       |           |           |                   |                   |            |          |     |                  |
| <b>Suvanto et al., 2018</b>     |           | 1     | 1      |       |           |           |                   |                   |            |          | 0   |                  |
| <b>Takano et al., 2016</b>      |           | 0     |        | 0     |           |           |                   |                   |            |          |     |                  |
| <b>Taylor et al., 2019</b>      |           | 0     | 0      | 1     |           |           |                   |                   |            |          |     |                  |
| <b>Torun and Altunel, 2020</b>  | 1         | 1     |        |       |           |           |                   |                   | 1          |          |     | 0                |

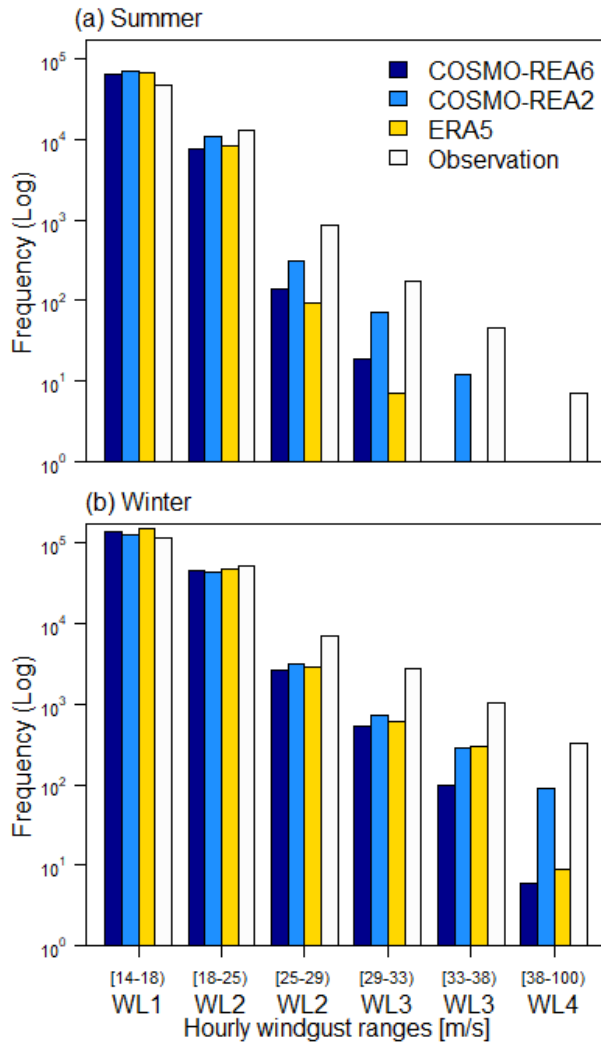

117

118 **Figure S1:** Frequency of threshold exceedance for warning level (WL) 1-4, used at DWD, of hourly wind  
 119 gusts. The wind speed intervals in m/s corresponding to the different WL are indicated by bracketed  
 120 numbers under the panels. The Observations (white) come from 145 locations of the DWD-Station  
 121 network and are compared to the reanalyses ERA5, COSMO-REA6 and COSMO-REA2. Panels show the  
 122 frequencies for summer months (a) and winter months (b) for the years 2007-2013.

123

124
